# Supplementary material for: Selective adsorption of malachite green (MG) and fuchsin acid (FA) by ZIF-67 hybridized polyvinylidene fluoride (PVDF) membranes
Source: Royal Society of Chemistry journal article supplement (doi:10.1039/d1dt01000j), 2021-01-01
Supplement: d1dt01000j1.pdf [file d1dt01000j1.pdf]

**Selective adsorption of Malachite green (MG) and Fuchsin acid (FA)  
by ZIF-67 hybridized Polyvinylidene fluoride (PVDF) membranes**

Ying Liu, Na Wang, Zhongqiao Sun, Yide Han, Junli Xu, Yan Xu, Junbiao Wu, Hao  
Meng and Xia Zhang\*

Department of Chemistry, College of Sciences, Northeastern University, Shenyang  
110819, P. R. China.

\*Corresponding author.

E-mail: xzhang@mail.neu.edu.cn.(Prof. X. Zhang)

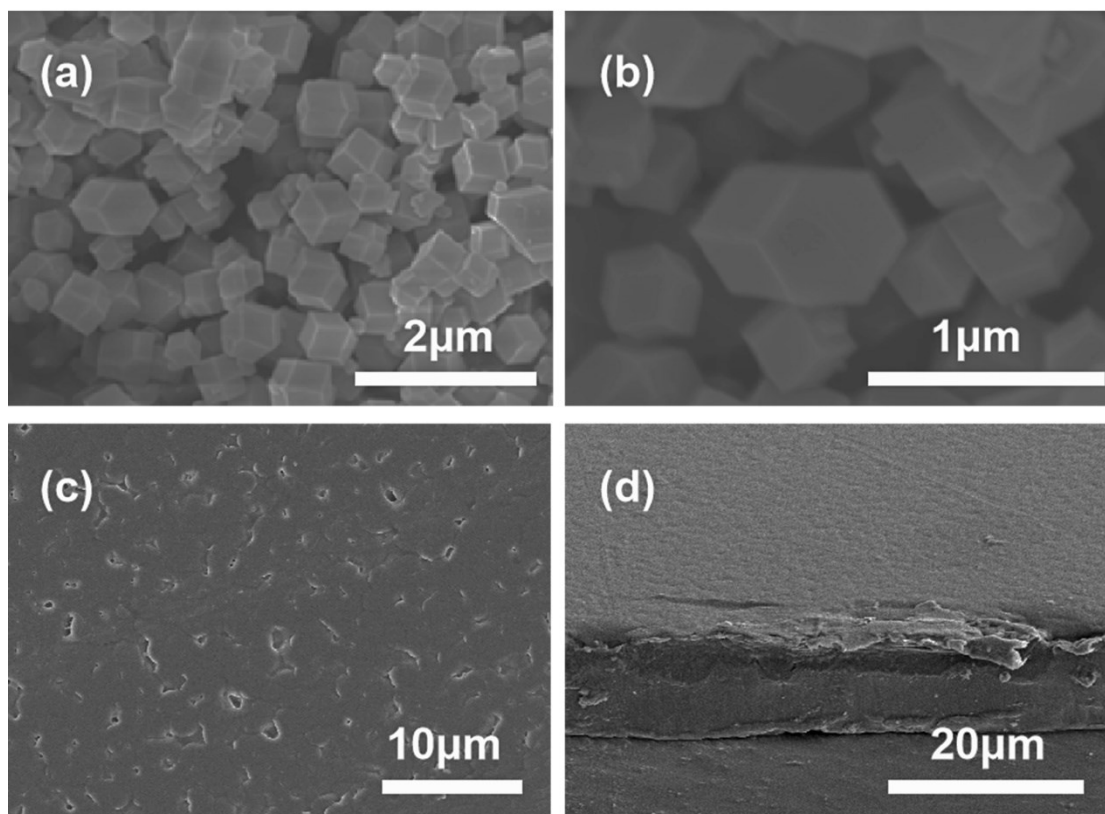

Fig.S1. SEM images of single ZIF-67 (a, b) at different magnification; SEM images of pristine PVDF (c, d): (c) front view; (d) cross section view.

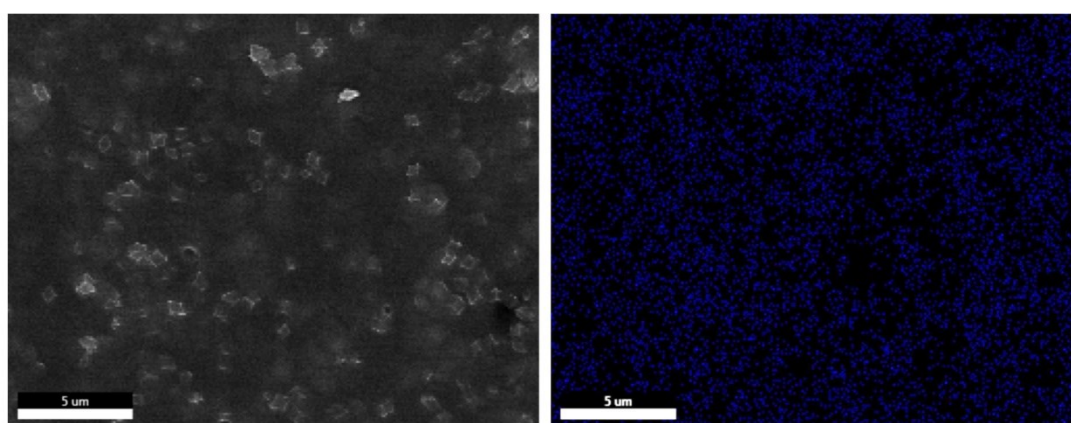

Fig.S2.SEM-EDS mapping of Co of the ZIF(4)/PVDF.

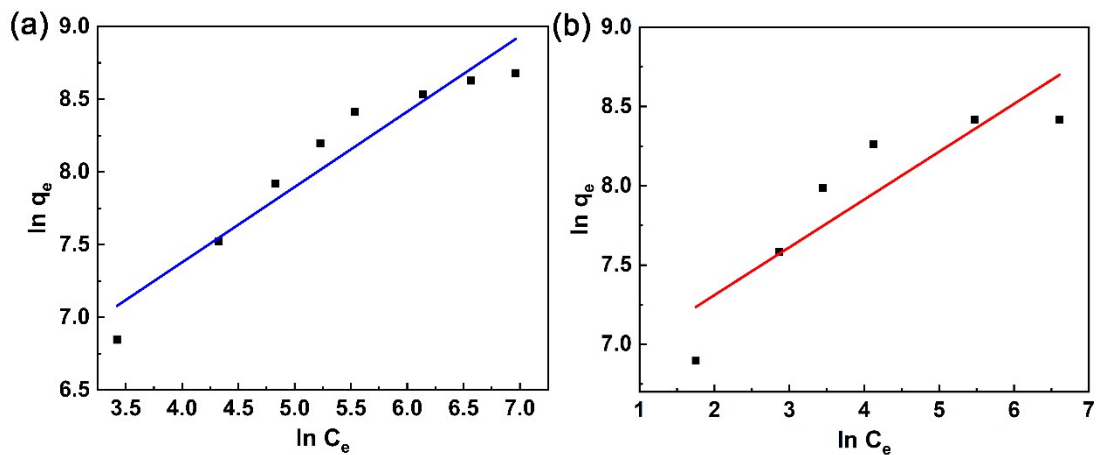

Fig.S3. Fitting curves of MG (a) and FA (b) using Freundlich model.

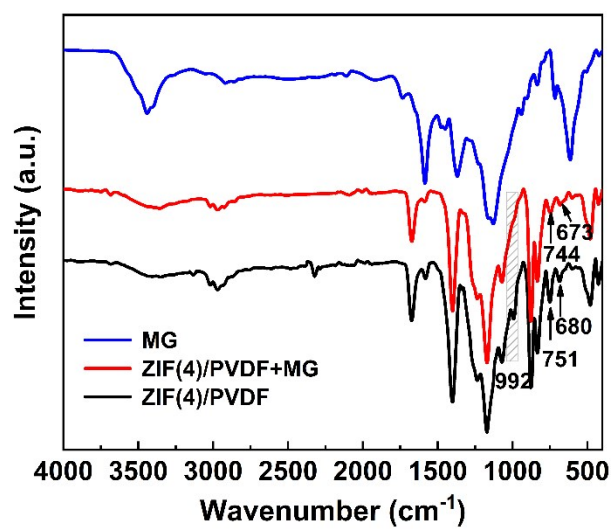

Fig.S4. FTIR spectra of MG, original ZIF(4)/PVDF and MG-adsorbed hybrid membranes.

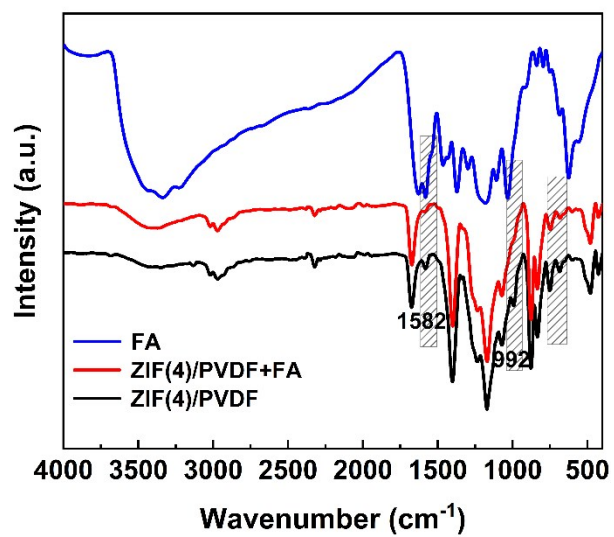

Fig.S5. FTIR spectra of FA, original ZIF (4)/PVDF and FA-adsorbed hybrid membranes.

Table S1. The adsorption performance of MOF/PVDF hybrid matrix membranes in the literature.

| PVDF-based membranes              | Organics         | Adsorption capacities            | Ref. |
|-----------------------------------|------------------|----------------------------------|------|
| MIL-53/PVDF                       | MB               | 264.7 mg/g                       | [1]  |
| ZIF-8/PVDF                        | Iodine ions      | 73.33 mg/g                       | [2]  |
| UiO-66/PVDF                       | Arsenate         | 267 mg/g                         | [3]  |
| NH <sub>2</sub> -MIL-101(Cr)/PVDF | CR               | 645.16 mg/g                      | [4]  |
| MIL-68/PVDF                       | PNP              | 183.49 $\mu\text{g}/\text{cm}^2$ | [5]  |
|                                   | MB               | 74.35 $\mu\text{g}/\text{cm}^2$  |      |
| Cu-BTC/PVDF                       | CR               | 1157.4 $\mu\text{g}/\text{cm}^2$ | [6]  |
| MOF-808/PVDF                      | Cd <sup>2+</sup> | 42.6 mg/g                        | [7]  |
|                                   | Zn <sup>2+</sup> | 17.17 mg/g                       |      |
| PVDF/PEDOT                        | MO               | 143.8 mg/g                       | [8]  |
| Aminated PAN/PVDF                 | Direct Red23     | 685.63 mg/g                      | [9]  |
| HAPNPS/PVDF                       | CR               | 10.83 mg/g                       | [10] |
| PVDF/GO                           | MB               | 621.1 mg/g                       | [11] |
| PVDF/PDA                          | CR               | 384.6 mg/g                       | [12] |
|                                   | MB               | 370.4 mg/g                       |      |
|                                   | Cr(VI)           | 126.7 mg/g                       |      |

Table.S2 The molecular weight, ionic nature and molecular structure of nine dyes.

| Dyes  | Molecular structure                                                                 | Ion species | Functional groups                   | Molecular weight |
|-------|-------------------------------------------------------------------------------------|-------------|-------------------------------------|------------------|
| FA    | 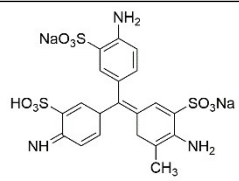   | anion       | -NH <sub>2</sub> , -SO <sub>3</sub> | 585.4            |
| MO    |    | anion       | -SO <sub>3</sub>                    | 327.33           |
| CR    |    | anion       | -NH <sub>2</sub> , -SO <sub>3</sub> | 696.68           |
| RB19  |    | anion       | -NH <sub>2</sub> , -SO <sub>3</sub> | 626.54           |
| AB210 |  | anion       | -NH <sub>2</sub> , -SO <sub>3</sub> | 938.02           |
| AY23  |  | anion       | -COOH, -SO <sub>3</sub>             | 1534.36          |
| RhB   |  | cation      | -COOH                               | 479.01           |
| MB    |  | cation      |                                     | 319.85           |
| MG    |  | cation      |                                     | 364.91           |

## References

- [1] Y. Ren, T. Li, W.M. Zhang, S. Wang, M.Q. Shi, C. Shan, W.B. Zhang, X.H. Guan, L. Lv, M. Hua, B.C. Pan, MIL-PVDF blend ultrafiltration membranes with ultrahigh MOF loading for simultaneous adsorption and catalytic oxidation of methylene blue, *J. Hazard. Mater.*, 365 (2019) 312-321. <https://doi.org/10.1016/j.jhazmat.2018.11.013>.
- [2] X. Long, Y.S. Chen, Q. Zheng, X.X. Xie, H. Tang, L.P. Jiang, J.T. Jiang, J.H. Qiu, Removal of iodine from aqueous solution by PVDF/ZIF-8 nanocomposite membranes, *Sep. Purif. Technol.*, 238 (2020) 11. <https://doi.org/10.1016/j.seppur.2019.116488>.
- [3] P. Wan, M.X. Yuan, X.L. Yu, Z. Zhang, B.L. Deng, Arsenate removal by reactive mixed matrix PVDF hollow fiber membranes with UIO-66 metal organic frameworks, *Chem. Eng. J.*, 382 (2020) 9. <https://doi.org/10.1016/j.cej.2019.122921>.
- [4] Y.M. Tan, Z.Q. Sun, H. Meng, Y.D. Han, J.B. Wu, J.L. Xu, Y. Xu, X. Zhang, Aminated metal-organic framework (NH<sub>2</sub>-MIL-101(Cr)) incorporated polyvinylidene (PVDF) hybrid membranes: Synthesis and application in efficient removal of Congo red from aqueous solution, *Appl. Organomet. Chem.*, 34 (2020) 13. <https://doi.org/10.1002/aoc.5281>.
- [5] Y.M. Tan, Z.Q. Sun, H. Meng, Y.D. Han, J.B. Wu, J.L. Xu, Y. Xu, X. Zhang, A new MOFs/polymer hybrid membrane: MIL-68(Al)/PVDF, fabrication and application in high-efficient removal of p-nitrophenol and methylene blue, *Sep. Purif. Technol.*, 215 (2019) 217-226. <https://doi.org/10.1016/j.seppur.2019.01.008>.
- [6] C.X. Yu, Y.Y. Liu, X. Zhang, Preparation of Cu-BTC/PVDF Hybrid Membranes Using in situ Doping Method and Their Enhanced Dye Adsorption Properties, *Chem. J. Chin. Univ.-Chin.*, 39 (2018) 1384-1391. <https://doi.org/10.1007/s12221-017-6814-7>.
- [7] J.E. Efome, D. Rana, T. Matsuura, C.Q. Lan, Insight Studies on Metal-Organic Framework Nanofibrous Membrane Adsorption and Activation for Heavy Metal Ions Removal from Aqueous Solution, *ACS Appl. Mater. Interfaces*, 10 (2018) 18619-18629. <https://doi.org/10.1021/acsami.8b01454>.
- [8] R.J. da Silva, L.C. Mojica-Sanchez, F.D.S. Gorza, G.C. Pedro, B.G. Maciel, G.P.

Ratkovski, H.D. da Rocha, K.T.O. do Nascimento, J.C. Medina-Llamas, A.E. Chavez-Guajardo, J.J. Alcaraz-Espinoza, C.P. de Melo, Kinetics and thermodynamic studies of Methyl Orange removal by polyvinylidene fluoride-PEDOT mats, *J. Environ. Sci.*, 100 (2021) 62-73. <https://doi.org/10.1016/j.dyepig.2019.107591>

[9] Z. Mokhtari-Shourijeh, S. Langari, L. Montazerghaem, N.M. Mahmoodi, Synthesis of porous aminated PAN/PVDF composite nanofibers by electrospinning: Characterization and Direct Red 23 removal, *J. Environ. Chem. Eng.*, 8 (2020) 7. <https://doi.org/10.1016/j.jtice.2016.02.008>

[10] J.H. Li, H. Zheng, H.X. Lin, B.X. Zhang, J.B. Wang, T.L. Li, Q.Q. Zhang, Preparation of Three Dimensional Hydroxyapatite Nanoparticles/Poly(vinylidene fluoride) Blend Membranes with Excellent Dye Removal Efficiency and Investigation of Adsorption Mechanism, *Chin. J. Polym. Sci.*, 37 (2019) 1234-1247. <https://doi.org/10.1007/s10118-019-2271-7>

[11] F.F. Ma, D. Zhang, T. Huang, N. Zhang, Y. Wang, Ultrasonication-assisted deposition of graphene oxide on electrospun poly (vinylidene fluoride) membrane and the adsorption behavior, *Chem. Eng. J.*, 358 (2019) 1065-1073. <https://doi.org/10.1016/j.cej.2018.10.121>

[12] F.F. Ma, D. Zhang, N. Zhang, T. Huang, Y. Wang, Polydopamine-assisted deposition of polypyrrole on electrospun poly (vinylidene fluoride) nanofibers for bidirectional removal of cation and anion dyes, *Chem. Eng. J.*, 354 (2018) 432-444. <https://doi.org/10.1016/j.cej.2018.08.048>
